1 Effect of diets containing whole or ground corn with and without soybean hulls  
2 on feeding calves during the suckling phase

3 Does using corn and soybean hulls affect calves' performance in the rearing  
4 phase?

5

6 Aline Evangelista Machado Santana<sup>1\*¶</sup>, José Neuman Miranda Neiva<sup>1¶</sup>, Vera Lúcia de Araújo  
7 Bozorg<sup>2&</sup>, João Restle<sup>3&</sup>, Ubirajara Bilego<sup>4&</sup>

8

9 <sup>1</sup>Departament of Animal Science, Federal University of Tocantins, Araguaína, Tocantins,  
10 Brazil

11 <sup>2</sup>Departament of Veterinary Medicine, Federal University of Tocantins, Araguaína, Tocantins,  
12 Brazil

13 <sup>3</sup>Departament of Animal Science, Federal University of Goias, Goiania, Goias, Brazil

14 <sup>4</sup>Departament of Veterinary Medicine, Agroindustrial Rural Producers Cooperative of  
15 Southwest Goias, Rio Verde, Goias, Brazil

16

17 \* Corresponding author

18 E-mail: [aline1machado@uft.edu.br](mailto:aline1machado@uft.edu.br) (AEMS)

19

20 <sup>¶</sup>These authors contributed equally to this work.

21 <sup>&</sup>These authors also contributed equally to this work.

22

## 23 **Abstract**

24 This work evaluated the use of soybean hulls and whole or ground corn in the diets of  
25 suckling calves. Diets containing two levels of soybean hull inclusion (0 and 400.1 g/kg) and  
26 corn in different physical forms (whole or ground) were evaluated in the diets of newborn  
27 crossbred dairy calves that were housed and received experimental diets plus four liters of  
28 milk per day over 56 days. Weekly samples of food, diets and leftovers were taken to  
29 determine dry matter and nutrient intake. To evaluate the apparent digestibility, samples were  
30 taken from the diets, leftovers and feces for three consecutive days using titanium dioxide as  
31 an indicator. Blood samples were also collected to evaluate the blood indicators. Including  
32 soybean hulls in the diet increased the consumption of neutral detergent fiber but reduced the  
33 consumption of non-fibrous carbohydrates, which was also reduced by using whole corn in  
34 the diet. Total digestible nutrient consumption did not vary, although its value was reduced by  
35 using whole corn and including soybean hulls. The apparent digestibilities of the dry matter  
36 and crude protein were similar, resulting in similar performances between the animals,  
37 regardless of the factors analyzed. Using soybean hulls or whole corn did not affect blood  
38 indicators or feeding costs. Soybean hull or whole corn usage did not affect the performance  
39 of crossbred dairy calves during rearing.

## 40 **Introduction**

41           Although milk producers are efficient at producing heifers, male cattle production is  
42 typically neglected. In Brazil, the number of cows milked corresponds to 23 million animals  
43 [1] with a birth rate of 50% male; thus, 11.5 million calves are produced annually. Although  
44 no official data exist on the number of calves slaughtered shortly after birth in Brazil,  
45 approximately 40% of these calves are slaughtered in their first days of life, representing  
46 approximately 4.6 million calves. This occurs because producers consider that these calves  
47 will increase their production costs without favorable financial returns; however, these  
48 animals can yield good productive results when their nutritional and hygiene requirements are  
49 fulfilled [2], mainly during the first days of the animal's life (0 to 60 days).

50           This period is the most costly in the production system; thus, solutions are needed to  
51 balance these costs, such as using palatable solid foods, which stimulate the animals to eat.  
52 This allows the animals' weaning age to be reduced because they benefit from more efficient  
53 use of the nutrients in solid food [3,4], which reduces the problems caused by weaning the  
54 animals early [5-7], increases the amount of milk available for sale and reduces the demand  
55 for labor.

56           However, the use of feedstuff, such as corn and soybeans meal, which are traditionally  
57 used in animal feed, in the biofuel production, has increased the price of these inputs [8].  
58 Thus, alternatives to these foods are needed to reduce feed costs, such as by-products  
59 including soybean hulls (SH), which are a good quality food with a low market value [9]. In  
60 addition, the degree of feed processing can be reduced by supplying whole corn grain, which  
61 reduces processing costs and allows supplying solid food with large particle sizes to induce  
62 the animals' normal chewing behaviors [10].

63           This study had as objective evaluated the effect of diets containing soybean hulls  
64 and whole or ground corn on the digestibility, cost of diets and performance of crossbred  
65 dairy calves during the rearing phase.

66

## 67           **Materials and methods**

68           The experimental procedures were approved by the Animal Ethics Committee of the  
69 Federal University of Tocantins under case no. 23101.004142/2015-06, which considers the  
70 ethical guidelines set by the Council of International Organizations of Medical Sciences,  
71 CIOMS/OMS, 1985, for research involving animals. The experiment was performed in the  
72 municipality of Rio Verde, Goiás state, Brazil, located at 17°47'52" south latitude and  
73 50°55'40" west longitude, from June to August 2013. The local climate is "Aw", per the  
74 Köppen-Geiger classification, and the precipitation and mean temperature in the months of  
75 the experiment were 0.23 mm and 22.08°C, respectively. The relative humidity was 61.42%.

76           The experiment was conducted in a completely randomized design with the treatments  
77 distributed in a 2 × 2 factorial arrangement without soybean hull (NSH) or with 400.1 g/kg  
78 soy hull (WSH) and corn in two forms, whole (WC) or ground (GC), with seven replicates.  
79 Twenty-eight newborn crossbred calves were used with bloodlines varying from 3/4 to 5/8  
80 Holstein × Zebu and initial weights of 33.01 kg. The total experimental period was 60 days;  
81 the calves were fed colostrum for 4 days, and data collection occurred on the remaining 56  
82 days.

83           The animals were treated against endo and ectoparasites, received injectable vitamins  
84 A, D and E and were housed in individual shelters covered with a shaded area of 2 m<sup>2</sup> and  
85 individual feeders and drinking troughs with rice husk bedding. The bedding was stirred daily  
86 by removing the wet bedding and feces, and each bed was replaced every seven days.

87 During the experimental period, the animals received diets composed of milk and the  
88 concentrate feed, which was formulated as isoprotein and contained corn, soybean hull,  
89 soybean meal and a commercial mineral core (Table 1).

90

91 Table 1 - Chemical and bromatological food compositions used to formulate the concentrates

| Variables, g/kg DM        | Corn  | Soybean Meal | Soybean Hull |
|---------------------------|-------|--------------|--------------|
| Dry Matter <sup>1</sup>   | 850.1 | 830.3        | 889.7        |
| Ashes                     | 17.1  | 65.1         | 45.8         |
| Neutral Detergent Fiber   | 113.0 | 154.5        | 655.6        |
| Hemicellulose             | 83.5  | 41.8         | 261.9        |
| Fiber in Acid Detergent   | 29.5  | 112.7        | 393.7        |
| Cellulose                 | 18.8  | 100.0        | 359.8        |
| Lignin                    | 10.7  | 12.7         | 33.9         |
| Ether Extract             | 41.5  | 21.3         | 10.5         |
| Crude Protein             | 81.9  | 474.9        | 146.9        |
| NDIN <sup>2</sup>         | 83.8  | 7.0          | 381.4        |
| ADIN <sup>3</sup>         | 47.9  | 3.8          | 139.0        |
| Non-fibrous Carbohydrates | 746.5 | 284.2        | 141.2        |
| Total Carbohydrates       | 859.5 | 438.7        | 796.8        |

92 <sup>1</sup>Dry matter: in g/kg of natural matter; <sup>2</sup>NDIN: neutral detergent insoluble nitrogen in g/kg in total nitrogen;

93 <sup>3</sup>ADIN: acid detergent insoluble nitrogen in g/kg of total nitrogen.

94

95 The concentrate (Table 2) was supplied to the animals ad libitum, keeping 5% of the  
96 leftovers, which were removed once weekly. Samples were then collected from the leftovers,  
97 while food and concentrate samples were collected during their preparation. Milk was

98 supplied in a restricted manner so that the animals consumed 4 liters per day, divided into two  
 99 feeding times, with 31.8 g/kg ether extract (EE), 29.5 g/kg crude protein (CP), 45.2 g/kg  
 100 lactose, 110.7 g/kg total dry extract and 79.8 g/kg fat-free dry extract.

101

102 Table 2 - Ingredient proportions and chemical-bromatological composition of the concentrates

| Food, g/kg DM             | Ground corn                         |                  | Whole Corn |       |
|---------------------------|-------------------------------------|------------------|------------|-------|
|                           | NSH <sup>1</sup>                    | WSH <sup>2</sup> | NSH        | WSH   |
|                           | Proportion of Ingredients           |                  |            |       |
| Whole Corn                | -                                   | -                | 712.0      | 400.1 |
| Ground Corn               | 712.0                               | 400.1            | -          | -     |
| Soybean Hull              | -                                   | 400.1            | -          | 400.1 |
| Soybean Meal              | 238.0                               | 148.0            | 238.0      | 148.0 |
| Mineral Core <sup>3</sup> | 50.0                                | 50.0             | 50.0       | 50.0  |
| Variables, g/kg DM        | Chemical-bromatological Composition |                  |            |       |
| Dry Matter <sup>4</sup>   | 890.6                               | 890.1            | 897.8      | 909.0 |
| Ashes                     | 71.9                                | 82.7             | 87.5       | 99.3  |
| Neutral Detergent Fiber   | 123.0                               | 381.5            | 110.2      | 379.8 |
| Hemicellulose             | 81.3                                | 188.1            | 70.8       | 191.9 |
| Acid Detergent Fiber      | 41.7                                | 193.4            | 39.4       | 187.9 |
| Cellulose                 | 30.9                                | 173.6            | 28.5       | 168.1 |
| Lignin                    | 10.8                                | 19.8             | 10.9       | 19.8  |
| Ether Extract             | 33.7                                | 27.6             | 34.2       | 28.4  |
| Crude Protein             | 176.5                               | 176.8            | 175.9      | 173.5 |
| NDIN <sup>5</sup>         | 89.6                                | 87.9             | 84.8       | 86.8  |
| ADIN <sup>6</sup>         | 43.8                                | 42.9             | 42.4       | 44.6  |

|                           |       |       |       |       |
|---------------------------|-------|-------|-------|-------|
| Non-fibrous Carbohydrates | 594.9 | 331.4 | 592.2 | 319.0 |
| Total Carbohydrates       | 717.9 | 712.9 | 702.4 | 698.8 |

103 <sup>1</sup>NSH: no soybean hull; <sup>2</sup>WSH: with soybean hull; <sup>3</sup>Mineral Core values: minimum calcium 220 g/kg,  
104 phosphorus 80 g/kg, vitamin A 300,000 IU, vitamin E 300 mg/kg, copper 860 mg/kg, zinc 3 g/kg, iodine 120  
105 mg/kg, iron 2 g/kg, manganese 1350 mg/kg, selenium 20 mg/kg, cobalt 80 mg/kg and monensin 1200 mg/kg;  
106 <sup>4</sup>Dry matter: in g/kg of natural matter; <sup>5</sup>NDIN: neutral detergent insoluble nitrogen in g/kg of total nitrogen;  
107 <sup>6</sup>ADIN: acid detergent insoluble nitrogen in g/kg of total nitrogen.

108

109 Feed concentrate samples were predried in a forced ventilation oven at 65°C to  
110 determine dry matter (DM) (Method 934.01 [11]), crude protein (Method 979.09 [11]) and  
111 ash (Method 942.05 [11]). The levels of neutral detergent fiber (NDF), acid detergent fiber  
112 (ADF) and lignin were determined as described previously [12], and the percentage of ether  
113 extract (EE) was determined by washing with petroleum ether at 90°C for one hour [13]. The  
114 values of non-fibrous carbohydrates (NFC), total carbohydrates (TC) and total digestible  
115 nutrients (TDN) were calculated per [14], where  $TC = 100 - (\%CP + \%EE + \%AS)$ ,  $NFC =$   
116  $TC - \%NDF$  and  $observed\ TDN = CPD + (EED \times 2.25) + TCD$ , where CPD = crude protein  
117 apparent digestible, EED = ether extract apparent digestible, AS = ashes and TDC = total  
118 carbohydrates digestible.

119 Dry matter intake (DMI), crude protein intake (CPI), ether extract intake (EEI), neutral  
120 detergent fiber intake (NDFI), non-fibrous carbohydrate intake (NFCI) and total digestible  
121 nutrient intake (TDNC) expressed in kilograms per day (kg/day) were calculated from the  
122 analyses. Average daily gain (ADG) and dry matter conversion efficiencies (DME) were  
123 calculated in kg of ADG /kg DM intake, crude protein efficiency (CPE) in kg ADG /kg of CP  
124 intake and total digestible nutrient efficiency (TDNE) in kg of ADG /kg of TDN intake. Total  
125 dry matter intake (TDMI), total crude protein intake (TCPI), total crude protein efficiency

126 (TCPE) and total dry matter conversion efficiency (TDME) were calculated, which were  
127 considered the intake of DM and CP from milk intake.

128 At the beginning and end of the experimental period, the animals were weighed  
129 individually in the morning, without previous fasting, and these weights were considered the  
130 initial live weight (IW) and final live weight (FW). During these weighings, the following  
131 morphometric measurements were recorded: withers height (WH), rump height (RH),  
132 thoracic perimeter (TP), arm perimeter (AP) and body length (BL). These measurements were  
133 always performed on the animals' left sides with the calves in quadrilateral position, using a  
134 hypometric measuring cane and a measuring tape in centimeters.

135 When the animals reached 56 days of age, food, leftover and fecal samples were  
136 collected and used to determine the apparent digestibility of the diets. These samples were  
137 collected after delivering 10 g of titanium dioxide daily (external indicator), supplied to the  
138 animals diluted in 50 ml of milk via esophageal catheter over 10 days, and stool was collected  
139 directly from the rectum during the last four days. These samples were immediately frozen at  
140  $-20^{\circ}\text{C}$  and subsequently transferred to the Laboratory of Animal Nutrition of the Federal  
141 University of Tocantins, where they were homogenized, thus forming composite samples that  
142 were predried in a forced ventilation oven at  $65^{\circ}\text{C}$  and analyzed to determine the total fecal  
143 production per the method described in [15] and used to calculate the apparent digestibility  
144 (DA) of the dry matter and the nutrients present in the diet, in which  $DA = 1 - [(\text{ingested}$   
145  $\text{nutrient} - \text{excreted nutrient})/\text{ingested nutrient}$ .

146 At the end of the experimental period, blood samples were collected by venipuncture of  
147 the jugular vein, without prior fasting. To measure blood glucose, samples were collected in  
148 tubes containing 10  $\mu\text{l}$  of EDTA and 10  $\mu\text{l}$  of sodium fluoride. The samples were cooled and  
149 sent to the Animal Pathology Laboratory of the Cooperativa Agroindustrial dos Produtores  
150 Rurais do Sudoeste Goiano (Agroindustrial Rural Producers Cooperative of Southwest Goias;



151 COMIGO), in Rio Verde-GO, where they were centrifuged for 15 minutes at 2000 g/min to  
152 separate the plasma and serum. These aliquots were placed in Eppendorf® tubes, identified  
153 and frozen at -20°C for subsequent analyses of glucose (GL), triglycerides (TG), total  
154 cholesterol (TCL), total protein (TP), albumin (ALB), urea (UR), aspartate aminotransferase  
155 (AST), alkaline phosphatase (ALT), and creatinine (CRT), which were performed at 37°C at  
156 the Laboratory of Animal Nutrition of the Federal University of Tocantins, using commercial  
157 tests from Labtest Diagnostica S.A.® and the Bioplus® Bio-2000 IL-A spectrophotometer.

158 To evaluate the costs associated with using the different diets, information was collected  
159 on the amount paid per kilogram of each food used to prepare the concentrates during the  
160 experimental evaluation period, during which time the value of the dollar corresponded to  
161 BRL 2.24. This information was used to calculate the cost per kilogram of diet (CKD), cost of  
162 daily feed (CDF) ( $CDF = CKD \times DMI/d$ ) and cost per kilogram of obtained gain (CKG)  
163 ( $CKG = CDF/ADG$ ).

164 The data were subjected to homoscedasticity and normality tests, and analysis of  
165 variance was performed on all continuous variables with normal distributions. The initial  
166 weight was used as the covariant and, when not significant, was taken from the model. The  
167 mathematical model used was represented by:

$$168 \quad \gamma_{ijkl} = \mu + \tau_i + \epsilon_j + \tau_i * \epsilon_j + \delta_l + a_{ij}$$

169 where  $\gamma_{ijkl}$  = dependent variable;  $\mu$  = overall mean;  $\tau_i$  = effect of factor i (inclusion level of  
170 the soybean hull);  $\epsilon_j$  = effect of factor j (physical form of the corn);  $\tau_i * \epsilon_j$  = interaction  
171 between factor i and factor j;  $\delta_l$  = effect of initial weight; and  $a_{ij}$  = residual experimental error  
172 associated with the factorial inclusion level of the soybean hull and the physical form of the  
173 corn. The data were analyzed using t-tests at 5% significance to compare the means when the  
174 interaction of the studied factors was not significant (>5% significance).

175

## 176 Results

177 No interaction was observed between corn processing and SH inclusion for the  
178 variables related to diet digestibility (Table 3). However, both the use of WC and the  
179 inclusion of SH reduced the TDN value of the diets ( $P = 0.02$  and  $P = 0.03$ , respectively),  
180 although including SH increased the NDF content digested by the animals ( $P < 0.01$ ).  
181 However, the DMAD, CPAD and NFCD results were not influenced by using WC or  
182 including SH, presenting averages of 0.87, 0.89 and 0.90, respectively.

183

184 Table 3 - Apparent digestibility coefficients and total digestible nutrient values of the diets

| Variables | Ground corn      |                  | Whole Corn |       | CV, % | P values        |       |         |
|-----------|------------------|------------------|------------|-------|-------|-----------------|-------|---------|
|           | NSH <sup>1</sup> | WSH <sup>2</sup> | NSH        | WSH   |       | PF <sup>3</sup> | SH    | PF × SH |
| DMAD      | 0.87             | 0.87             | 0.87       | 0.87  | 1.26  | 0.92            | 0.66  | 0.53    |
| NDFD      | 0.40             | 0.52             | 0.41       | 0.52  | 5.94  | 0.54            | <0.01 | 0.74    |
| CPAD      | 0.89             | 0.90             | 0.90       | 0.90  | 1.87  | 0.69            | 0.59  | 0.62    |
| NFCD      | 0.90             | 0.90             | 0.90       | 0.91  | 1.94  | 0.75            | 0.97  | 0.86    |
| TDN       | 84.94            | 83.90            | 83.76      | 82.31 | 1.77  | 0.02            | 0.03  | 0.72    |

185 <sup>1</sup>NSH: no soybean hull; <sup>2</sup>WSH: with soybean hull; <sup>3</sup>PF: physical form; DMAD: dry matter apparent digestibility;  
186 NDFD: neutral detergent fiber digestibility; CPAD: crude protein apparent digestibility; NFCD: non-fibrous  
187 carbohydrates digestibility; TDN: total digestible nutrients.

188

189 No interaction was observed between the inclusion level of SH in the diet and the  
190 physical form of corn grain for the variables related to consumption (Table 4). However,  
191 when analyzed separately, SH use increased the NDFI ( $P < 0.01$ ) and reduced the NFCI ( $P <$   
192  $0.01$ ), which was also reduced by using WC in the diets ( $P = 0.04$ ). The other consumptions  
193 presented similar results, regardless of physical form of the corn grain or SH inclusion level,

194 with means of 0.39 kg/d DMI, 0.88 kg/d TDMI, 0.07 kg/d CPI, 0.20 kg/d TCPI and 0.75 kg/d  
195 TDNI.

196

197 Table 4 - Nutrient intake of crossbred dairy calves

| Variables,<br>kg/d | Ground corn      |                  | Whole Corn |      | CV, % | P values        |       |         |
|--------------------|------------------|------------------|------------|------|-------|-----------------|-------|---------|
|                    | NSH <sup>1</sup> | WSH <sup>2</sup> | NSH        | WSH  |       | PF <sup>3</sup> | SH    | PF × SH |
| DMI                | 0.47             | 0.43             | 0.28       | 0.39 | 45.83 | 0.11            | 0.58  | 0.24    |
| TDMI               | 0.96             | 0.92             | 0.77       | 0.89 | 20.22 | 0.12            | 0.56  | 0.25    |
| CPI                | 0.09             | 0.07             | 0.06       | 0.08 | 49.06 | 0.38            | 0.87  | 0.23    |
| TCPI               | 0.21             | 0.20             | 0.18       | 0.20 | 18.39 | 0.37            | 0.86  | 0.24    |
| NDFI               | 0.05             | 0.21             | 0.02       | 0.20 | 55.93 | 0.50            | <0.01 | 0.76    |
| NFCI               | 0.27             | 0.09             | 0.16       | 0.08 | 50.01 | 0.04            | <0.01 | 0.07    |
| TDNI               | 0.82             | 0.78             | 0.65       | 0.73 | 21.4  | 0.08            | 0.73  | 0.29    |

198 <sup>1</sup>NSH: no soybean hull; <sup>2</sup>WSH: with soybean hull; <sup>3</sup>PF: physical form; DMI: dry matter intake; TDMI: total dry  
199 matter intake; CPI: crude protein intake; TCPI: total crude protein intake; NDFI: neutral detergent fiber intake;  
200 NFCI: non-fibrous carbohydrates intake; TDNI: total digestible nutrients intake.

201

202 The blood biochemical indicator results (Table 5) were not dependent on the evaluated  
203 factors, and the means were 88.57 mg/dl GL, 26.77 g/dl TCL, 36.82 mg/dl TG, 6.07 g/dl TP,  
204 2.65 g/dl ALB, 6.33 mg/dl UR, 48.24 U/l AST, 116.19 U/l ALP and 1.19 mg/dl CRT.

205

206 Table 5 - Biochemical indicators in the blood of crossbred dairy calves

| Variables | Ground Corn      |                  | Whole Corn |       | CV, % | P values        |      |         |
|-----------|------------------|------------------|------------|-------|-------|-----------------|------|---------|
|           | NSH <sup>1</sup> | WSH <sup>2</sup> | NSH        | WSH   |       | PF <sup>3</sup> | SH   | PF × SH |
| GL, mg/dl | 83.71            | 90.29            | 89.64      | 90.67 | 15.85 | 0.55            | 0.48 | 0.60    |

|            |        |        |        |        |       |      |      |      |
|------------|--------|--------|--------|--------|-------|------|------|------|
| TCL, mg/dl | 25.79  | 28.36  | 24.79  | 28.17  | 55.84 | 0.92 | 0.60 | 0.94 |
| TG, mg/dl  | 28.93  | 40.00  | 42.36  | 36.00  | 33.43 | 0.32 | 0.62 | 0.07 |
| TP, g/dl   | 5.70   | 6.13   | 6.49   | 5.98   | 11.57 | 0.23 | 0.88 | 0.09 |
| ALB, g/dl  | 2.71   | 2.80   | 2.46   | 2.64   | 12.04 | 0.10 | 0.27 | 0.73 |
| UR, mg/dl  | 6.57   | 5.86   | 8.07   | 4.83   | 42.07 | 0.81 | 0.06 | 0.22 |
| AST, U/ml  | 46.03  | 47.14  | 44.17  | 46.13  | 24.18 | 0.42 | 0.99 | 0.69 |
| ALP, U/ml  | 148.00 | 108.57 | 104.29 | 103.92 | 59.72 | 0.37 | 0.45 | 0.46 |
| CRT, mg/dl | 1.25   | 1.04   | 1.26   | 1.21   | 26.9  | 0.46 | 0.28 | 0.50 |

207 <sup>1</sup>NSH: no soybean hull; <sup>2</sup>WSH: with soybean hull; <sup>3</sup>PF: physical form; GL: glucose; TCL: total cholesterol; TG:  
 208 triglycerides; TP: total protein; ALB: albumin; UR: urea; AST: aspartate aminotransferase; ALP: alkaline  
 209 phosphatase; CRT: creatinine.

210

211 The physical form and the SH inclusion level no affected the variables related to the  
 212 animals' performance (Table 6). The means were 64.28 kg FW, 31.28 kg TWG, 0.56 kg/d  
 213 ADG, 1.64 kg gain/kg MS in DME, 0.62 kg gain/kg MS in TDME, 8.69 kg gain/kg CP in  
 214 CPE, 2.76 kg gain/kg CP in the TCPE and 0.75 kg gain/kg TDN in TDNE.

215

216 Table 6 - Performance of crossbred dairy calves

| Variables | Ground corn      |                  | Whole Corn |       | CV, % | P values        |      |         |
|-----------|------------------|------------------|------------|-------|-------|-----------------|------|---------|
|           | NSH <sup>1</sup> | WSH <sup>2</sup> | NSH        | WSH   |       | PF <sup>3</sup> | SH   | PF × SH |
| IW        | 32.93            | 32.00            | 32.43      | 34.67 | 18.75 | 0.65            | 0.78 | 0.51    |
| FW        | 69.43            | 63.64            | 58.00      | 66.08 | 18.79 | 0.33            | 0.80 | 0.14    |
| TWG       | 36.50            | 31.64            | 25.57      | 31.42 | 27.44 | 0.10            | 0.88 | 0.11    |
| ADG       | 0.65             | 0.57             | 0.46       | 0.56  | 27.54 | 0.09            | 0.87 | 0.10    |
| DME       | 1.51             | 1.52             | 2.00       | 1.54  | 38.11 | 0.29            | 0.35 | 0.32    |

|      |      |      |      |      |       |      |      |      |
|------|------|------|------|------|-------|------|------|------|
| TDME | 0.68 | 0.61 | 0.58 | 0.63 | 19.92 | 0.48 | 0.85 | 0.20 |
| CPE  | 8.00 | 9.79 | 9.27 | 7.73 | 43.60 | 0.79 | 0.93 | 0.26 |
| TCPE | 3.03 | 2.85 | 2.42 | 2.75 | 22.96 | 0.15 | 0.76 | 0.30 |
| TDNE | 0.80 | 0.72 | 0.69 | 0.77 | 20.00 | 0.62 | 0.99 | 0.18 |

217 <sup>1</sup>NSH: no soybean hull; <sup>2</sup>WSH: with soybean hull; <sup>3</sup>PF: physical form; IW: initial live weight in kg; PF: final live  
 218 weight in kg; TWG: total weight gain in kg; ADG: average daily gain in kg/d; DME: dry matter conversion  
 219 efficiency in kg/kg; TDME: total dry matter conversion efficiency in kg/kg; CPE: crude protein conversion  
 220 efficiency in kg/kg; TCPE: total crude protein conversion efficiency in kg/kg; TDNE: total digestible nutrient  
 221 conversion efficiency in kg/kg.

222

223 The data obtained in the morphometric evaluation presented results independent of the  
 224 physical form of the corn and the CS inclusion level (Table 7) in evaluating both the final  
 225 results and the respective gains during the suckling period.

226

227 Table 7 - Morphometric measurements of crossbred dairy calves

| Variables,<br>cm | Ground corn      |                  | Whole Corn |       | CV, % | P values        |      |         |
|------------------|------------------|------------------|------------|-------|-------|-----------------|------|---------|
|                  | NSH <sup>1</sup> | WSH <sup>2</sup> | NSH        | WSH   |       | PF <sup>3</sup> | SH   | PF × SH |
| IWH              | 72.86            | 70.21            | 70.36      | 72.25 | 5.02  | 0.86            | 0.78 | 0.11    |
| IRH              | 76.57            | 75.29            | 74.14      | 76.67 | 5.68  | 0.75            | 0.71 | 0.25    |
| IAP              | 11.36            | 11.33            | 10.93      | 11.17 | 8.08  | 0.39            | 0.76 | 0.69    |
| IBL              | 61.79            | 59.00            | 60.93      | 62.22 | 9.25  | 0.58            | 0.73 | 0.35    |
| ITP              | 75.86            | 75.07            | 71.21      | 77.00 | 7.59  | 0.53            | 0.25 | 0.14    |
| WHG              | 10.36            | 12.28            | 11.07      | 9.50  | 33.42 | 0.49            | 0.84 | 0.23    |
| RHG              | 11.07            | 11.86            | 10.78      | 11.66 | 31.19 | 0.84            | 0.54 | 0.99    |
| APG              | 1.00             | 1.24             | 0.93       | 1.00  | 46.78 | 0.41            | 0.38 | 0.70    |

|     |       |       |       |       |       |       |      |      |
|-----|-------|-------|-------|-------|-------|-------|------|------|
| BLG | 12.36 | 11.71 | 10.65 | 8.95  | 47.50 | 0.29  | 0.60 | 0.74 |
| TPG | 20.07 | 19.86 | 15.28 | 18.25 | 39.39 | 24.71 | 0.61 | 0.60 |
| FWH | 83.21 | 82.50 | 81.43 | 81.75 | 5.45  | 0.46  | 0.91 | 0.76 |
| FRH | 87.64 | 87.14 | 82.36 | 88.33 | 7.11  | 0.38  | 0.25 | 0.18 |
| FAP | 12.36 | 12.57 | 11.86 | 12.17 | 6.83  | 0.16  | 0.42 | 0.88 |
| FBL | 74.14 | 70.71 | 67.43 | 71.17 | 7.37  | 0.13  | 0.94 | 0.08 |
| FTP | 95.93 | 93.50 | 86.50 | 95.25 | 9.01  | 0.71  | 0.56 | 0.73 |

228 <sup>1</sup>NSH: no soybean hull; <sup>2</sup>WSH: with soybean hull; <sup>3</sup>PF: physical form; IWH: initial wither height; IRH: initial  
 229 rump height; IAP: initial arm perimeter; IBL: initial body length; ITP: initial thoracic perimeter; WHG: withers  
 230 height gain; RHG: rump height gain; APG: arm perimeter gain; BLG: body length gain; TPG: thoracic perimeter  
 231 gain; FWH: final wither height; FRH: final rump height; FAP: final arm perimeter; FBL: final body length; FTP:  
 232 final thoracic perimeter.

233

234 Considering the cost of the ingredients during the evaluation period, SH and WC  
 235 usages were insufficient for reducing feed costs (Table 8); the CDF was US \$2.06, while the  
 236 CQK was US \$3.74.

237

238 Table 8 - Costs associated with crossbred dairy calf feed

| Variables | Ground corn      |                  | Whole Corn |      | CV,<br>% | P values        |      |         |
|-----------|------------------|------------------|------------|------|----------|-----------------|------|---------|
|           | NSH <sup>1</sup> | WSH <sup>2</sup> | NSH        | WSH  |          | PF <sup>3</sup> | SH   | PF × SH |
| CKD       | 0.28             | 0.25             | 0.27       | 0.24 | -        | -               | -    | -       |
| DCM       | 1.95             | 1.95             | 1.95       | 1.95 | -        | -               | -    | -       |
| CDF       | 2.10             | 2.07             | 2.04       | 2.06 | 2.53     | 0.06            | 0.89 | 0.21    |
| CKG       | 3.23             | 3.63             | 4.43       | 3.67 | 50.35    | 0.44            | 0.81 | 0.15    |

239 <sup>1</sup>NSH: no soybean hull; <sup>2</sup>WSH: with soybean hull; <sup>3</sup>PF: physical form; <sup>4</sup>Price quotation performed during the  
 240 experimental phase where: ground corn US \$0.185/kg, whole corn US \$0.172/kg, soybean hull US \$0.16/kg,  
 241 soybean meal US \$0.432/kg and mineral core 0.894/kg; CKD: cost per kilogram of diet in dollars per kilogram

242 of dry matter; DCM: daily cost with milk (0.488 US \$/l of milk); CDF: cost of daily feed (price/4 L of milk +  
243 price/kg feed × DMI); CKG: cost per kilogram of gain (CDF/ADG).

244

## 245 **Discussion**

246       Supplying solid feed to calves beneficially affected prestomach development [4], as  
247 shown by the digestibility presented by the diets. The high digestibility observed for the dry  
248 matter and nutrients evaluated indicated that although the animals were young, using solid  
249 foods resulted in high digestibility of the nutrients in the diet, for example, CPAD, which is a  
250 nutrient highly required by animals during the initial production phase [16].

251       Although cattle digest fibrous feed efficiently only from the moment the rumen is  
252 functional, the high NDFD in WSH diets demonstrated that although this food is high in fiber  
253 (Table 1), the fiber has high quality because of the high pectin content [16] and low lignin  
254 content [16, 17]. This allowed even the young animals to take advantage of the fiber present  
255 in this feed, although at this age, they have a reduced capacity for digesting carbohydrates  
256 such as cellulose [18, 19], which is present in large quantities in SH (Table 1).

257       Although NDFD was favored, SH had a lower energy content than corn (3.4 Mcal/kg  
258 and 3.9 Mcal/kg, respectively [16]), causing it to reduce the TDN value of the diet. This result  
259 is common when CS is used instead of energetic concentrates, such as corn, in bovine diets  
260 [20, 21], and the literature shows that as the SH inclusion level increases, expressive  
261 variations in the TDN value of the diet increases [9].

262       This reduction in the amount of digestible nutrients available to the animals also  
263 occurred with WC grain use, despite the diets with whole and ground grain presenting the  
264 same chemical-bromatological compositions (Table 2). However, this variation between the  
265 TDN level in the diets with WC or GC was only 1.64%, representing minimal change. Thus,  
266 the proximity between the TDN value of the diets with WC and GC allowed the animals fed

267 these diets to revert to the difference in TDN value, since they achieved TDNI results similar  
268 to those fed GC.

269 This similarity was evidenced in the animals' blood data, since the glycemc levels  
270 remained within the range considered normal for the animal category [22], indicating that the  
271 animals received sufficient nutrients to meet their needs. In addition, the creatinine, AST and  
272 ALP results indicated that the experimental diets did not alter or impair the animals' hepatic  
273 (AST and ALP) [23,24] or renal (creatinine) functions [25,26]. That is, the diets promoted  
274 little metabolic challenge to the suckling calves, as the levels of these indicators remained  
275 within the normal variation ranges for suckling Holstein calves per [27] (creatinine between  
276 0.98 and 1.56 mg/dl, AST between 27.6 and 46.3 U/ml and APL between 67.71 and 141.33  
277 U/ml).

278 Considering the intake of other nutrients, the corn grain used in this work was the hard  
279 type (flint) associated with the use of nonpelleted feed, such as soybean meal, and the mineral  
280 core may have contributed to the reduced NFCI, since the animals fed whole grains selected  
281 their diets, preferentially feeding on components of the diet that were easier to chew, to the  
282 detriment to corn grain consumption. This selection favored the decreased NFCI since the  
283 soybean meal had a much lower NFC content than that found in corn (184 and 754 g/kg,  
284 respectively [16]).

285 In addition, because soybean hulls have NFC contents lower than that found in corn,  
286 as well as high NDF levels (Table 1) and are constituted basically by structural carbohydrates,  
287 their inclusion in the diet also contributed to the reduced NFCI, resulting in an increased  
288 NDFI. Results similar to those in the present study are commonly reported in the literature  
289 when SH is included in diets that present high energy contents [28, 29]. This occurs because  
290 SH inclusion usually reduces the proportion of foods, such as corn and sorghum, which  
291 present high NFC contents and low NDF ratios.



292 DMI and TDMI (concentrate + milk) occurring similarly among the diets indicated  
293 that the diets were well-accepted by the animals and showed good palatability. These  
294 characteristics are very important at this stage of production, since ingesting solid food  
295 reduces the animals' dependence on liquid food [30], enabling the weaning age to be reduced  
296 [16] and accelerating the return of invested capital in animal production.

297 In addition, the DMI and TDMI variables were 0.39 and 0.89 kg/d, respectively. These  
298 results were lower than those observed in the work of [24], which evaluated the inclusion of  
299 soybean hulls in the diet of calves during the breeding phase and found a mean DMI of  
300 concentrated feed of 0.49 kg/d. However, despite the lower consumption values, the feed  
301 conversion results were better, and the animals needed to consume 1.70 kg of TDM to gain  
302 one kilogram live weight, whereas in the work by [31], the animals needed 1.91 kg/d,  
303 showing that the animals were highly efficient, what corresponded to a reflex in the weight  
304 gain, since the animals presented ADG of 0.56 kg/d.

305 We compared the results of weight gained in the WSH diets with the results of other  
306 studies in the literature, and found that SH has a superior performance during the rearing  
307 phase (ADG of 0.35 [32] and 0.45 kg/d [33]) when evaluating by-products similar to SH with  
308 high fiber content and low particle size, such as babassu mesocarp meal [32] and citrus pulp  
309 [33], in the diets of dairy calves. Thus, SH is a good option to be used in facilities that  
310 produce this type of animal, since it allows the animals to be weaned with high weights.

311 The animals fed the experimental diets developed well based on the data from the  
312 morphometric measurements performed on the animals during the suckling phase. During the  
313 evaluation period, the animals presented significant gains for these measurements; however,  
314 these gains were similar between the diets, which reflected the similarity in the animals'  
315 weight gain and TDNI. This was also highlighted by another study [34] that obtained similar

316 metabolizable energy intakes in Holstein calves, thus resulting in similar morphometric  
317 measurements for these animals.

318         Despite the favorable results regarding animal performance, SH use or the reduction in  
319 processing by using WC did not reduce feed costs, even when the costs were analyzed as a  
320 function of weight gain. These results demonstrate the need for a greater difference in the  
321 market value between GC and WC and between GC and SH to significantly reduce  
322 production costs by using WC or SH in calf diets during suckling.

323         Reduced diet costs with SH use was observed by [35], who observed a 20% decrease  
324 in costs per kilogram weight gain by using up to 30% SH in Nellore steer diets. However, in  
325 this study, the difference between the GC and SH prices was 25%, whereas in the present  
326 study, the variation was only 14%.

327         In addition, when considering calf production costs, milk represents a large proportion  
328 of daily feed costs (94%), demonstrating the importance of reducing the animals' weaning  
329 age. As milk is the main source of income for dairy farms, reducing the weaning age reduces  
330 calf production costs, as it reduces the amount of milk used to feed the animals during rearing  
331 [36].

332

## 333         **Conclusion**

334         Using soybean hull or whole corn in crossbred dairy calves' diets during the rearing  
335 phase does not impair their performance or change their blood markers; however, it does not  
336 reduce the costs associated with feed during rearing.

337

## 338         **Acknowledgments**

339         The financial support provided by CNPq for the realization of this research.

## References

340

341 1. FAO (Food and Agriculture Organization). Gridded livestock of the World. Wint W  
342 and Robinson T. Rome; 2007.

343

344 2. Razook AG, Leme PR, Packer IU, Luchiari Filho A, Nordos RF, Trovo JB, et al.  
345 Evaluation of Nelore, Canchim, Santa Gertrudis, Holstein, Brown Swiss and Caracu  
346 as sire breeds in matings with Nelore cows. Effects on progeny growth, carcass traits  
347 and crossbred production. 3<sup>rd</sup> World Congress on Genetics Applied to Livestock  
348 Production. Nebraska; 1986. pp. 348-352.

349

350 3. Baldwin RL, McLeod KR, Klotz JL, Heltmann RN. Rumen development, intestinal  
351 growth and hepatic metabolism in the pre- and postweaning ruminant. J Dairy Sci.  
352 2004; 87: 55-65.

353

354 4. Heinrichs J. Rumen Development in the dairy calf. Adv Dairy Technol. 2005; 17: 179-  
355 187.

356

357 5. Khan MA, Lee HJ, Lee WS, Kim HS, Ki KS, Hur TY, et al. Structural growth, rumen  
358 development, and metabolic and immune responses of Holstein male calves fed milk  
359 through step-down and conventional methods. J Dairy Sci. 2007; 90:3376-3387.

360

361 6. Khan MA, Lee HJ, Lee WS, Kim HS, Kim SB, Ki KS, et al. Pre- and postweaning  
362 performance of Holstein female calves fed milk through stepdown and conventional  
363 methods. J Dairy Sci. 2007; 90:876-885.

364

- 365 7. Khan MA, Lee HJ, Lee WS, Kim HS, Kim SB, Park SB, et al. Starch source  
366 evaluation in calf starter: II. Ruminal parameters, rumen development, nutrient  
367 digestibilities, and nitrogen utilization in Holstein calves. *J Dairy Sci.* 2008; 91:1140-  
368 1149.
- 369
- 370 8. Wallington TA, Anderson JE, Mueller SA, Kolinski Morris E, Winkler SL, Ginder  
371 JM, et al. Corn ethanol production, food exports, and indirect land use change.  
372 *Environ Sci Technol.* 2012; 46: 6379-6384.
- 373
- 374 9. Ipharraguerre IR, Clark JH. Soyhulls as an alternative feed for lactating dairy cows: a  
375 review. *J Dairy Sci.* 2003; 86: 1052-1073.
- 376
- 377 10. Beauchemin KA, McAllister TA, Dong Y, Farr BI, Cheng KJ. Effects of mastication  
378 on digestion of whole cereal grains by cattle. *J Anim Sci.* 1994; 72: 236-246.
- 379
- 380 11. AOAC - Association of Official Analytical Chemists. Official methods of analysis.  
381 16th ed. Arlington: AOAC International; 1990.
- 382
- 383 12. Van Soest PJ, Roberttson JB, Lewis BA. Methods for dietary fiber, neutral detergent  
384 fiber, and non starch polysaccharides in relation to animal nutrition. *J Dairy Sci.* 1991;  
385 74: 3583-3597.
- 386
- 387 13. Ankom. Operator's manual – ANKOM XT 10 extraction system. Macedon. 2009.
- 388

- 389 14. Sniffen CJ, O'Connor JD, Van Soest DG, Fox DG, Russell JB. A net carbohydrate  
390 and protein system for evaluating cattle diets: II. Carbohydrate and protein  
391 availability. *J Anim Sci.* 1992; 70: 3562-3577.  
392
- 393 15. INCT – Instituto Nacional de Ciência e Tecnologia de Ciência Animal. Métodos para  
394 análise de alimentos. Editores: Detmann E, Souza MA, Valadares Filho SC, Queiroz  
395 AC, Berchielli TT, Saliba EOS, et al. Visconde do Rio Branco; UFV, 2012.  
396
- 397 16. NRC - National Research Council (NRC). Nutrient Requirements of Dairy Cattle, 7th  
398 ed. Washington, DC; The National Academy Press, 2001.  
399
- 400 17. Miron J, Yosef E, Bem-Chedalia D. Composition and in vitro digestibility of  
401 monossacharide constituents of selected byproduct feeds. *J Agricult and Food Chemis.*  
402 2001; 49: 2322-2326.  
403
- 404 18. Anderson KL, Nagaraja TG, Morrill JL. Ruminant metabolic development in calves  
405 weaned conventionally or early. *J Dairy Sci.* 1987; 70: 1000-1005.  
406
- 407 19. Anderson KL, Nagaraja TG, Morrill JL, Avery TB, Galitzer SJ, Boyer JE. Ruminant  
408 microbial development in conventionally or early weaned calves. *J Anim Sci.* 1987;  
409 64: 1215-1226.  
410
- 411 20. Löest CA, Titgemeyer EC, Drouillard JS, Blasi DA, Bindel DJ. Soybean hulls as  
412 primary ingredient in forage-free diets for limit-fed growing cattle. *J Anim Sci.* 2001;  
413 79: 766-774.

- 414 21. Mueller CJ, Boggs DL. Use of soybean hulls with or without corn by-product protein  
415 sources in feedlot back grounding diets. *Prof Anim Scient*. 2011, 27: 228-234.  
416
- 417 22. Pogliani FC, Birgel Júnior E. Valores de referência do lipidograma de bovinos da raça  
418 holandesa, criados no Estado de São Paulo. *Braz J Vet Res Anim Sci*. 2007; 44: 373-  
419 383.  
420
- 421 23. Franzese A, Vajro P, Argenziano A, Puzziello A, Iannucci MP, Saviano MC, et al.  
422 Liver involvement in obese children. Ultrasonography and liver enzyme levels at  
423 diagnosis and during follow-up in an Italian population. *Dig Dis Sci*. 1997; 42: 1428-  
424 1432.  
425
- 426 24. Stojevic Z, Pirsljin J, Milinkovic-Tur S, Zdelar-Tur M, Ljubic BB. Activities of AST,  
427 ALT and GGT in clinically healthy dairy cows during lactation and in the dry period.  
428 *Vet Arhiv*. 2005; 75: 67-73.  
429
- 430 25. Finco DR. Kidney function. In: Kaneko JJ. *Clinical biochemistry of domestic animals*.  
431 4 ed. San Diego: Academic Press; 1989. pp. 496-542.  
432
- 433 26. Thrall MA, Weiser G, Allison RW, Campbell TW. *Veterinary hematology and clinical*  
434 *chemistray*. 2 ed. Ames: Wiley-Blackwell; 2012.  
435
- 436 27. Fagliari JJ, Santana AE, Lucas FA, Campos Filho E, Curi PR. Constituintes  
437 sanguíneos de bovinos lactantes, desmamados e adultos das raças Nelore (*Bos indicus*)

- 438 e Holandesa (*Bos taurus*) e de bubalinos (*Bubalus bubalis*) da raça Murrah. Arq Bras  
439 Med Vet Zootec. 1998; 50: 263-271.
- 440
- 441 28. Cannas A, Cabiddu A, Bomboi G, Ligios S, Floris B, Molle G. Decreasing dietary  
442 NFC concentration during mid-lactation of dairy ewes: Does it result in higher milk  
443 production? Small Ruminant Res. 2013; 111: 41-49.
- 444
- 445 29. Freitas LS, Brondani IL, Segabinazzi LR, Restle J, Alves Filho, DC, Pizzuti LA, et al.  
446 Performance of finishing steers fed different sources of carbohydrates. Rev Bras Zootec.  
447 2013; 42: 354-362.
- 448
- 449 30. Hodgson J. The development of solid food intake in calves. 5. The relation ship  
450 between liquid and solid food intake. Anim Prod. 1971; 13: 593-597.
- 451
- 452 31. Gomes IPO, Thaler Neto A, Medeiros LA, Orsolin V, Peres Neto E, Semmelmann  
453 CEN. Níveis de casca de soja em rações concentradas para bezerros de raças leiteiras.  
454 Arch Vet Sci. 2012; 17: 52-57.
- 455
- 456 32. Pedrico A, Neiva JNM, Brigel LML, Cruz LA, Souza LF, Freitas, BB. Consumo de  
457 nutrientes em bezerros alimentados com concentrados contendo farelo do mesocarpo.  
458 48ª Reunião Anual da Sociedade Brasileira de Zootecnia. Belém: Sociedade Brasileira  
459 de Zootecnia – UFV; 2011.
- 460

- 461 33. Schach FJ, Schach E, Zanetti MA, Brisola ML. Substituição do milho em grão moído  
462 por polpa cítrica na desmama precoce de bezerros leiteiros. Rev Bras Zootec. 2001;  
463 30: 280-286.  
464
- 465 34. Bartlett KS, McKeith FK, VandeHaar MJ, Dahl GE, Drackley JK. Growth and body  
466 composition of dairy calves fed Milk replacers containing different amounts of protein  
467 at two feeding rates. J Anim Sci. 2014; 84: 1454-1467.  
468
- 469 35. Katsuki PA. Avaliação nutricional, desempenho e qualidade da carne de bovinos  
470 alimentados com rações sem forragem, com diferentes níveis de substituição do milho  
471 inteiro por casca de soja. M. Sc. Thesis, Universidade Estadual de Londrina. 2009.  
472 Available from:  
473 [http://www.uel.br/pos/ciencia\\_animal/arquivos/Tese%20PedroKatsuki\\_27.07.09.pdf](http://www.uel.br/pos/ciencia_animal/arquivos/Tese%20PedroKatsuki_27.07.09.pdf)  
474
- 475 36. Bjorklund EA, Heins BJ, Chester-Jones H. Whole-milk feeding duration, calf growth,  
476 and probability of group-fed calves in na organic production system. J. Dairy Sci.  
477 2013; 96: 7363-7370.
